# Supplementary material for: First-principles study of lithium aluminosilicate glass scintillators
Source: Royal Society of Chemistry journal article supplement (doi:10.1039/d3cp05576k), 2024-01-01
Supplement: d3cp05576k1.pdf [file d3cp05576k1.pdf]

## Supplementary Materials: First-Principles Study of Li-Aluminosilicate Glass Scintillators

E. M. Ghardi<sup>a</sup>, A. Scrimshire<sup>b</sup>, R. Smith<sup>b</sup>, P. A. Bingham<sup>b</sup>, S. C. Middleburgh<sup>a</sup>, W. E. Lee<sup>a</sup>, and M. J. D. Rushton<sup>a</sup>

<sup>a</sup> Nuclear Futures Institute, Bangor University, Gwynedd, LL57 2DG, United Kingdom

<sup>b</sup> Materials and Engineering Research Institute, College of Business, Technology and Engineering, Sheffield Hallam University, S1 1WB, Sheffield, UK

Table S1:

Calculated electronic band gap  $E_g$ , valence band maximum  $E_{VBM}$ , conduction band minimum  $E_{CBM}$  and obtained glass densities for 20 configurations of each glass compositions. In red, experimental values from Tyrrell [1].

| Glass Model     | GS2          |                |               |                              | GSR1         |                |               |                             | GSR2         |                |               |                             |
|-----------------|--------------|----------------|---------------|------------------------------|--------------|----------------|---------------|-----------------------------|--------------|----------------|---------------|-----------------------------|
|                 | $E_g$ (eV)   | $E_{VBM}$ (eV) | $E_{CB}$ (eV) | $\rho$ (g/cm <sup>3</sup> )  | $E_g$ (eV)   | $E_{VBM}$ (eV) | $E_{CB}$ (eV) | $\rho$ (g/cm <sup>3</sup> ) | $E_g$ (eV)   | $E_{VBM}$ (eV) | $E_{CB}$ (eV) | $\rho$ (g/cm <sup>3</sup> ) |
| <b>1</b>        | 1.924        | 4.008          | 5.932         | 2.77                         | 3.041        | 2.088          | 5.129         | 2.35                        | 2.272        | 2.747          | 5.019         | 2.61                        |
| <b>2</b>        | 1.468        | 4.014          | 5.482         | 2.74                         | 2.563        | 2.637          | 5.2           | 2.34                        | 2.209        | 3.562          | 5.771         | 2.57                        |
| <b>3</b>        | 2.569        | 3.181          | 5.75          | 2.72                         | 2.897        | 2.945          | 5.842         | 2.56                        | 3.195        | 2.465          | 5.66          | 2.57                        |
| <b>4</b>        | 2.889        | 3.045          | 5.934         | 2.73                         | 2.274        | 2.622          | 4.896         | 2.40                        | 2.577        | 2.579          | 5.156         | 2.54                        |
| <b>5</b>        | 2.076        | 3.879          | 5.955         | 2.76                         | 2.55         | 3.037          | 5.587         | 2.44                        | 2.731        | 2.383          | 5.114         | 2.49                        |
| <b>6</b>        | 2.403        | 2.837          | 5.24          | 2.59                         | 2.718        | 2.799          | 5.517         | 2.48                        | 2.363        | 2.978          | 5.341         | 2.43                        |
| <b>7</b>        | 2.389        | 3.916          | 6.305         | 2.85                         | 2.576        | 3.378          | 5.954         | 2.56                        | 2.689        | 3.043          | 5.732         | 2.58                        |
| <b>8</b>        | 2.738        | 3.293          | 6.031         | 2.80                         | 2.389        | 3.301          | 5.69          | 2.49                        | 2.38         | 3.135          | 5.515         | 2.48                        |
| <b>9</b>        | 2.569        | 3.369          | 5.938         | 2.76                         | 2.572        | 3.176          | 5.748         | 2.50                        | 3.023        | 2.898          | 5.921         | 2.63                        |
| <b>10</b>       | 2.578        | 3.261          | 5.839         | 2.70                         | 2.218        | 3.129          | 5.347         | 2.40                        | 3.028        | 2.36           | 5.388         | 2.46                        |
| <b>11</b>       | 2.404        | 3.073          | 5.477         | 2.65                         | 2.24         | 3.203          | 5.443         | 2.51                        | 2.585        | 1.864          | 4.449         | 2.41                        |
| <b>12</b>       | 1.733        | 3.911          | 5.644         | 2.66                         | 2.244        | 3.005          | 5.249         | 2.48                        | 2.716        | 2.826          | 5.542         | 2.54                        |
| <b>13</b>       | 2.065        | 3.481          | 5.546         | 2.67                         | 2.711        | 2.952          | 5.663         | 2.49                        | 2.221        | 3.376          | 5.597         | 2.55                        |
| <b>14</b>       | 3.09         | 3.018          | 6.108         | 2.82                         | 2.557        | 2.849          | 5.406         | 2.45                        | 2.699        | 2.593          | 5.292         | 2.47                        |
| <b>15</b>       | 2.223        | 3.389          | 5.612         | 2.67                         | 2.755        | 2.639          | 5.394         | 2.50                        | 3.018        | 2.326          | 5.344         | 2.48                        |
| <b>16</b>       | 2.58         | 3.287          | 5.867         | 2.75                         | 2.073        | 2.93           | 5.003         | 2.46                        | 2.839        | 2.985          | 5.824         | 2.60                        |
| <b>17</b>       | 2.103        | 3.599          | 5.702         | 2.71                         | 2.708        | 2.661          | 5.369         | 2.39                        | 3.169        | 2.382          | 5.551         | 2.51                        |
| <b>18</b>       | 1.918        | 3.833          | 5.751         | 2.71                         | 2.362        | 3.047          | 5.409         | 2.43                        | 1.955        | 2.987          | 4.942         | 2.62                        |
| <b>19</b>       | 1.916        | 3.963          | 5.879         | 2.74                         | 2.74         | 3.121          | 5.861         | 2.54                        | 2.227        | 3.275          | 5.502         | 2.49                        |
| <b>20</b>       | 1.929        | 3.948          | 5.877         | 2.75                         | 2.773        | 2.265          | 5.038         | 2.48                        | 2.331        | 2.671          | 5.212         | 2.52                        |
| <b>Average</b>  | <b>2.281</b> | <b>3.515</b>   | <b>5.793</b>  | <b>2.73</b><br><b>(2.66)</b> | <b>2.548</b> | <b>2.8892</b>  | <b>5.437</b>  | <b>2.46</b>                 | <b>2.611</b> | <b>2.771</b>   | <b>5.393</b>  | <b>2.53</b>                 |
| <b>Std dev.</b> | <b>0.092</b> | <b>0.087</b>   | <b>0.055</b>  | <b>0.014</b>                 | <b>0.057</b> | <b>0.074</b>   | <b>0.067</b>  | <b>0.014</b>                | <b>0.08</b>  | <b>0.093</b>   | <b>0.078</b>  | <b>0.014</b>                |

- [1] G.C. Tyrrell, Phosphors and scintillators in radiation imaging detectors, Nucl Instrum Methods Phys Res A. 546 (2005) 180–187. <https://doi.org/https://doi.org/10.1016/j.nima.2005.03.103>.
